# Supplementary material for: Comparison of Burrows-Wheeler Transform-Based Mapping Algorithms Used in High-Throughput Whole-Genome Sequencing: Application to Illumina Data for Livestock Genomes
Source: Front Genet. 2018 Feb 26;9:35. doi: 10.3389/fgene.2018.00035 (PMC5834436; doi:10.3389/fgene.2018.00035)
Supplement: Supplementary file 1 [file Table1.XLSX]

## Sheet: H350_100
Simulation	Coverage (x)
Sim1	11.64
Sim2	16.57
Sim3	14.2
Sim4	24.78
Sim5	19.13
Sim6	13.81
Sim7	11.99
Sim8	18.18
Sim9	22.42
Sim10	22.56
Sim11	22.5
Sim12	13.06
Sim13	18.17
Sim14	23.12
Sim15	11.82
Sim16	22.85
Sim17	23.5
Sim18	13.27
Sim19	11.15
Sim20	17.11
Sim21	22.53
Sim22	17.04
Sim23	16.21
Sim24	17.54
Sim25	11.88
Sim26	11.98
Sim27	23.06
Sim28	19.04
Sim29	13.98
Sim30	22.97
Sim31	10.87
Sim32	16.87
Sim33	20.83
Sim34	15.08
Sim35	16.02
Sim36	17.9
Sim37	23.41
Sim38	21.68
Sim39	11.04
Sim40	14.18
Sim41	15.69
Sim42	22.97
Sim43	16.3
Sim44	13.6
Sim45	18.96
Sim46	17.19
Sim47	23.48
Sim48	24.02
Sim49	22.27
Sim50	20.63

## Sheet: M350_100
Simulation	Coverage (x)
Sim1	5.88
Sim2	5.97
Sim3	8.08
Sim4	6.35
Sim5	7.8
Sim6	9.72
Sim7	8.57
Sim8	8.4
Sim9	9.8
Sim10	8.88
Sim11	8.04
Sim12	9.74
Sim13	5.3
Sim14	6.34
Sim15	9.93
Sim16	8.86
Sim17	7.38
Sim18	8.4
Sim19	7.08
Sim20	6.9
Sim21	6.07
Sim22	6.91
Sim23	5.15
Sim24	7.36
Sim25	6.67
Sim26	9.88
Sim27	7.78
Sim28	9.23
Sim29	7.04
Sim30	7.31
Sim31	9.13
Sim32	9.96
Sim33	7.62
Sim34	9.63
Sim35	8.7
Sim36	7.84
Sim37	9.84
Sim38	9.12
Sim39	9.8
Sim40	8.23
Sim41	6.9
Sim42	7.38
Sim43	9.56
Sim44	5.07
Sim45	5.78
Sim46	7.36
Sim47	7.71
Sim48	5.3
Sim49	8.29
Sim50	9.45

## Sheet: L350_100
Simulation	Coverage (x)
Sim1	3.41
Sim2	4.16
Sim3	4.2
Sim4	1.2
Sim5	2.13
Sim6	3.61
Sim7	2.96
Sim8	4.89
Sim9	3.99
Sim10	3.27
Sim11	2.2
Sim12	2.02
Sim13	4.55
Sim14	2.79
Sim15	4.26
Sim16	1.39
Sim17	4.44
Sim18	1.11
Sim19	4.6
Sim20	4.6
Sim21	3.1
Sim22	1.48
Sim23	1.71
Sim24	3.82
Sim25	4.33
Sim26	1.14
Sim27	4.03
Sim28	4.83
Sim29	2.37
Sim30	3.55
Sim31	2.37
Sim32	1.87
Sim33	4.14
Sim34	3.89
Sim35	2.12
Sim36	3.33
Sim37	2.68
Sim38	1.37
Sim39	1.1
Sim40	2.96
Sim41	2.11
Sim42	2.36
Sim43	2.15
Sim44	1.68
Sim45	2.6
Sim46	3.79
Sim47	1.81
Sim48	3.67
Sim49	2.77
Sim50	2.73

## Sheet: H350_150
Simulation	Coverage (x)
Sim1	22.49
Sim2	20.9
Sim3	17.95
Sim4	22.44
Sim5	17.68
Sim6	18.28
Sim7	13.2
Sim8	18.82
Sim9	12.14
Sim10	10.78
Sim11	20.25
Sim12	19.13
Sim13	13.29
Sim14	16.09
Sim15	19.45
Sim16	18.33
Sim17	11.91
Sim18	12.54
Sim19	10.01
Sim20	16.27
Sim21	17.33
Sim22	12.4
Sim23	20
Sim24	10.27
Sim25	11.8
Sim26	24.28
Sim27	24.64
Sim28	10.46
Sim29	17.41
Sim30	22.94
Sim31	13.64
Sim32	22.51
Sim33	22.2
Sim34	19.43
Sim35	10.03
Sim36	15.7
Sim37	23.57
Sim38	20.21
Sim39	15.68
Sim40	19.48
Sim41	13.65
Sim42	18.57
Sim43	24.73
Sim44	22.75
Sim45	14.25
Sim46	20.24
Sim47	15.37
Sim48	24.8
Sim49	11.26
Sim50	13.75

## Sheet: M350_150
Simulation	Coverage (x)
Sim1	6.2
Sim2	8.42
Sim3	9.2
Sim4	9.85
Sim5	6.08
Sim6	8.8
Sim7	7.92
Sim8	7.01
Sim9	7.55
Sim10	7.48
Sim11	8.26
Sim12	8.72
Sim13	6.51
Sim14	5.45
Sim15	9.13
Sim16	6.95
Sim17	8.88
Sim18	5.9
Sim19	5.55
Sim20	9.53
Sim21	9.38
Sim22	10
Sim23	9.32
Sim24	5.18
Sim25	7.72
Sim26	9.99
Sim27	7.56
Sim28	9.37
Sim29	5.35
Sim30	9.94
Sim31	9.61
Sim32	7.82
Sim33	7.16
Sim34	6.69
Sim35	8.6
Sim36	5.07
Sim37	6.87
Sim38	9.61
Sim39	7.73
Sim40	7.37
Sim41	7.48
Sim42	6.54
Sim43	9.75
Sim44	9.91
Sim45	7.57
Sim46	9.96
Sim47	7.28
Sim48	7.13
Sim49	6.07
Sim50	5.97

## Sheet: L350_150
Simulation	Coverage (x)
Sim1	3.97
Sim2	4.6
Sim3	1.26
Sim4	2.34
Sim5	1.02
Sim6	4.31
Sim7	3.03
Sim8	2.46
Sim9	1.91
Sim10	3.14
Sim11	2.16
Sim12	1.27
Sim13	1.34
Sim14	1.27
Sim15	2.64
Sim16	1.49
Sim17	2.77
Sim18	4.6
Sim19	2.41
Sim20	1.48
Sim21	3.28
Sim22	4.5
Sim23	2.39
Sim24	1.17
Sim25	1.57
Sim26	1.31
Sim27	3.96
Sim28	2.83
Sim29	3.67
Sim30	3.8
Sim31	3.29
Sim32	3.51
Sim33	4.51
Sim34	3.65
Sim35	4.5
Sim36	2.87
Sim37	1.57
Sim38	1.27
Sim39	3.86
Sim40	2.23
Sim41	3.68
Sim42	3.61
Sim43	3.12
Sim44	3.86
Sim45	3.02
Sim46	2.95
Sim47	2.99
Sim48	4.74
Sim49	2.56
Sim50	1.47

## Sheet: H550_100
Simulation	Coverage (x)
Sim1	21.74
Sim2	18.5
Sim3	22.17
Sim4	18.65
Sim5	24.16
Sim6	23.07
Sim7	17.61
Sim8	21.83
Sim9	17.1
Sim10	22.43
Sim11	14.84
Sim12	24.64
Sim13	14.17
Sim14	11.09
Sim15	21.27
Sim16	22.47
Sim17	23.84
Sim18	14.91
Sim19	22.06
Sim20	18.07
Sim21	16.95
Sim22	22.31
Sim23	24.28
Sim24	11.14
Sim25	20.63
Sim26	13.52
Sim27	15.98
Sim28	14.02
Sim29	22.49
Sim30	24.93
Sim31	19.75
Sim32	20.56
Sim33	23.98
Sim34	20.31
Sim35	18.53
Sim36	15.71
Sim37	19.52
Sim38	15.45
Sim39	16.11
Sim40	15.53
Sim41	17.03
Sim42	17.55
Sim43	23.66
Sim44	13.1
Sim45	15.08
Sim46	18.61
Sim47	17.3
Sim48	13.93
Sim49	18.69
Sim50	23.17

## Sheet: M550_100
Simulation	Coverage (x)
Sim1	6.02
Sim2	9.07
Sim3	6.97
Sim4	5.27
Sim5	6.88
Sim6	8.87
Sim7	5.83
Sim8	9.56
Sim9	6.6
Sim10	6.65
Sim11	6.02
Sim12	8.84
Sim13	5.35
Sim14	9.75
Sim15	5.79
Sim16	6.43
Sim17	8.44
Sim18	5.71
Sim19	7.56
Sim20	8.61
Sim21	9.64
Sim22	8.66
Sim23	8.75
Sim24	7.04
Sim25	6.2
Sim26	7.6
Sim27	6.1
Sim28	9.21
Sim29	8.31
Sim30	9.08
Sim31	8.97
Sim32	7.35
Sim33	6.55
Sim34	8.44
Sim35	9.93
Sim36	8.85
Sim37	9.15
Sim38	8.53
Sim39	7.98
Sim40	8.76
Sim41	7.48
Sim42	9.33
Sim43	5.34
Sim44	9.84
Sim45	5.49
Sim46	7.73
Sim47	7.01
Sim48	5.54
Sim49	8.62
Sim50	8.07

## Sheet: L550_100
Simulation	Coverage (x)
Sim1	2.81
Sim2	2.52
Sim3	4.7
Sim4	3.96
Sim5	3.95
Sim6	4.79
Sim7	3.04
Sim8	4.17
Sim9	2.81
Sim10	4.4
Sim11	2.56
Sim12	3.95
Sim13	4.91
Sim14	3.09
Sim15	2.72
Sim16	1.83
Sim17	2.29
Sim18	1.44
Sim19	2.5
Sim20	2.32
Sim21	2.37
Sim22	4.27
Sim23	3.13
Sim24	3.08
Sim25	4.1
Sim26	1.48
Sim27	3.5
Sim28	2.39
Sim29	2.34
Sim30	3.3
Sim31	4.46
Sim32	1.79
Sim33	3.69
Sim34	4.61
Sim35	1.8
Sim36	2.19
Sim37	2.99
Sim38	4.56
Sim39	3.01
Sim40	2.11
Sim41	3.14
Sim42	3.3
Sim43	2.65
Sim44	1.06
Sim45	3.81
Sim46	3.03
Sim47	2.53
Sim48	1.26
Sim49	2.43
Sim50	1.94

## Sheet: H550_150
Simulation	Coverage (x)
Sim1	13.32
Sim2	24.09
Sim3	17.23
Sim4	18.1
Sim5	13.32
Sim6	11.44
Sim7	10.9
Sim8	22.29
Sim9	21.57
Sim10	12.94
Sim11	23.43
Sim12	20.26
Sim13	19.85
Sim14	24.86
Sim15	10.51
Sim16	16.36
Sim17	17.35
Sim18	18.75
Sim19	11.25
Sim20	19.9
Sim21	10.78
Sim22	18.35
Sim23	20.68
Sim24	17.32
Sim25	19.26
Sim26	13.21
Sim27	19.68
Sim28	15.71
Sim29	11.56
Sim30	15.66
Sim31	13.94
Sim32	13.62
Sim33	19.34
Sim34	17.84
Sim35	16.2
Sim36	13.27
Sim37	22.88
Sim38	22.92
Sim39	14.26
Sim40	19.23
Sim41	21.69
Sim42	24.32
Sim43	23.79
Sim44	15.77
Sim45	12.44
Sim46	21.95
Sim47	11.71
Sim48	12.38
Sim49	15.34
Sim50	22.72

[truncated: 2 more sheets: M550_150, L550_150]
